# Supplementary material for: Elucidation of MRAS-mediated Noonan syndrome with cardiac hypertrophy
Source: JCI journal article supplement (doi:10.1172/jci.insight.91225), 2017-03-08
Supplement: sd1 [file 1]

## Supplemental Figure 1. Structural Features of p.Gly23Val-MRAS after Twenty Nanosecond Molecular Dynamic Simulations

The corresponding conformations of WT-MRAS (white) vs. p.Gly23Val-MRAS (red) were compared after superimposition using the best RMSD. Circles denote the regions of the protein which the mutation-associated remodeling leads to the State I-to-State II transition, namely Switch I (blue) and Switch II (green). These changes in secondary structure are responsible of the remodeling in the active site and the exposure of surfaces for protein-protein interactions.

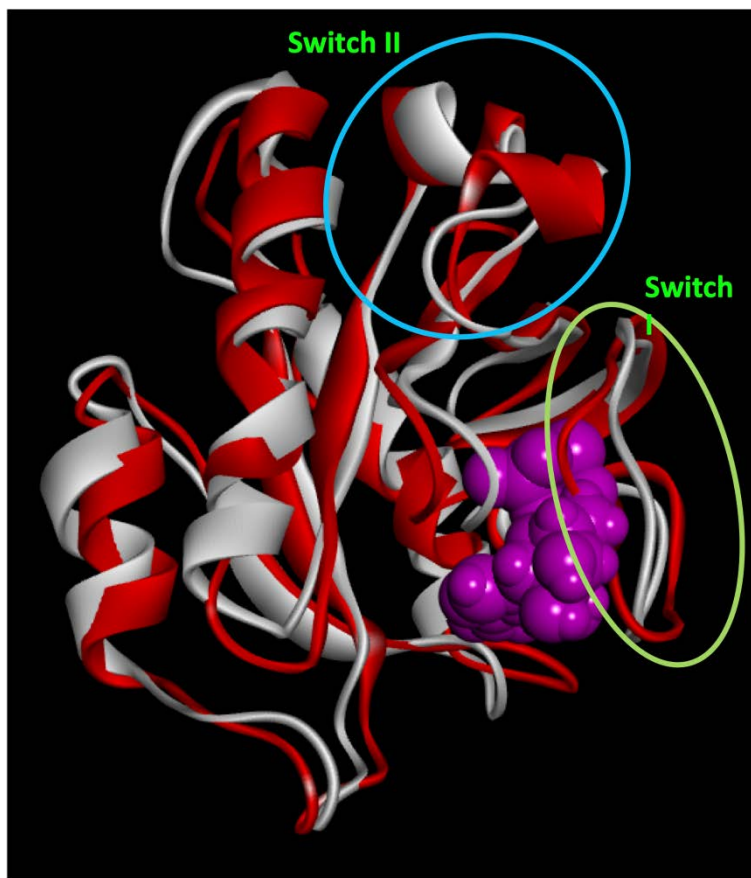

**Supplemental Figure 2. Remodeling of p.Gly23Val-MRAS after Molecular Dynamic Simulations Cause Exposure of Distinct Interphase Surfaces for Interaction with Effectors**

Comparative surface analyses were performed for WT-MRAS (yellow) and p.Gly23Val-MRAS (red) following molecular dynamic simulations. p.Gly23Val-MRAS displays surface changes, particularly at the Switch I (green circle) and II (light blue circle) regions and near the nucleotide (turquoise) binding site. Graphics display the water-accessible surface.

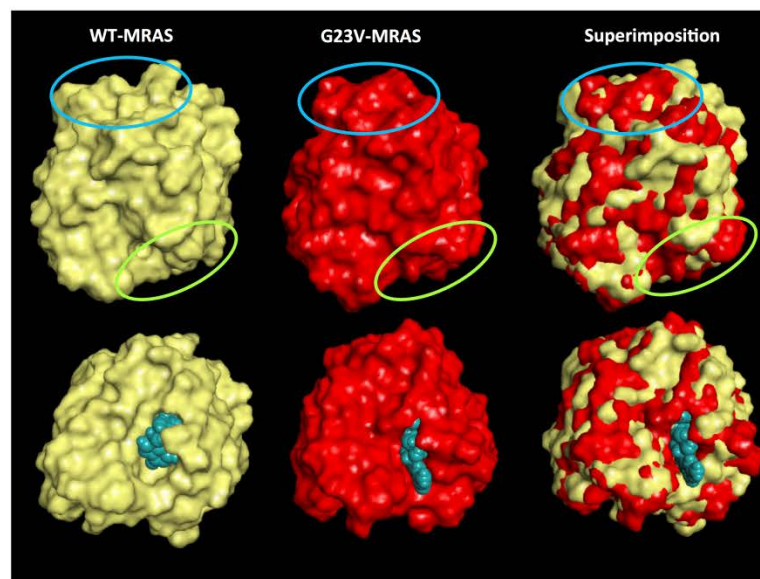

**Supplemental Figure 3. Clinical Phenotype of Patient Harboring p.Thr68Ile-MRAS mutation.**

- A) The patient at 20 months of age shows sparse hair, tall forehead, apparent hypertelorism and mild ptosis.
- B) The patient at 6 years of age shows thick hair, apparent hypertelorism, mild ptosis, low-set, posteriorly rotated ears and pointed chin.

A

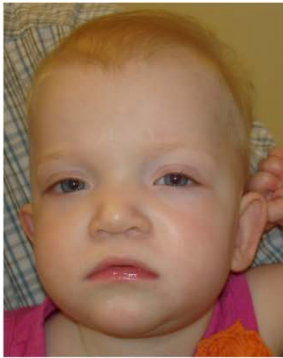

B

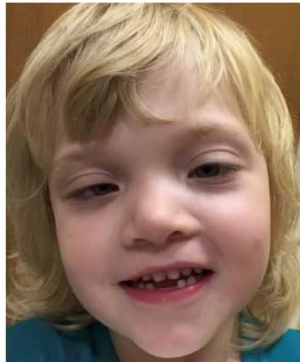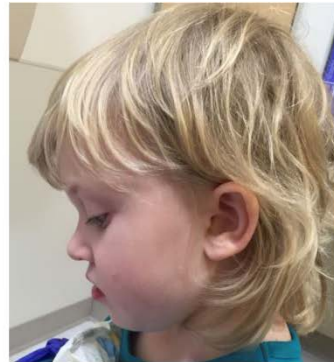

## Supplemental Figure 4. Molecular Modeling of Human WT-MRAS and the Patient's p.Gly23Val-MRAS

A) The homology-based model of human MRAS, derived from the structure of murine MRAS as a template.

B) The model of p.Gly23Val-MRAS was generated by in vitro mutagenesis.

C) The Ramachandran plot performed after energy minimization, for the homology-derived human WT-MRAS protein displays more than 97% of residues within the allowed regions.

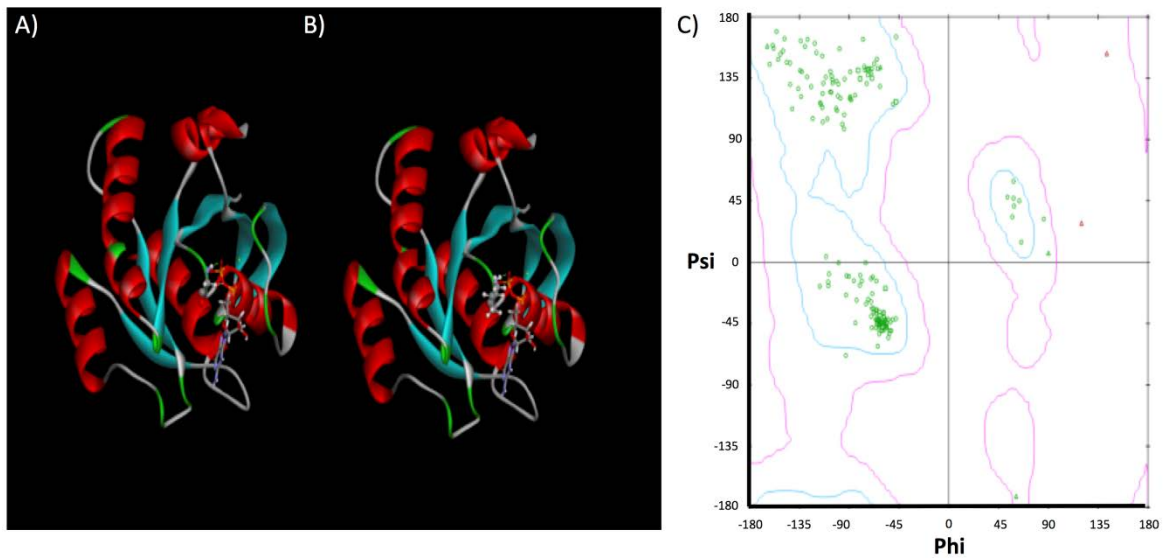

**Supplemental Table 1.** *In Silico* Analyses of Patient Derived Variants

| <b>Tool</b>              | <b>G23V-MRAS</b>    | <b>C25G-MICAL2</b>   | <b>R559Q-MICAL2</b> |
|--------------------------|---------------------|----------------------|---------------------|
| <b>PolyPhen2</b>         | Probably damaging   | Probably damaging    | Possibly damaging   |
| <b>Provean</b>           | -8.24 (deleterious) | -10.87 (deleterious) | -3.57 (deleterious) |
| <b>SIFT</b>              | 0.000 (damaging)    | .001 (damaging)      | 0.093 (tolerated)   |
| <b>Mutation Assessor</b> | 3.56 (high)         | 3.155 (medium)       | 3.12 (medium)       |
| <b>Fathmm</b>            | -1.77 (damaging)    | 1.04 (tolerated)     | -3.55 (damaging)    |
| <b>Align GVD</b>         | 109.55 (C65)        | 158.23 (C65)         | 42.81 (C35)         |

**Supplemental Table 2.** Oligonucleotide Primers for Mutational Analysis of *MRAS*

| <b>Exon</b> | <b>Forward primer (5'-3')</b> | <b>Reverse primer (5'-3')</b> |
|-------------|-------------------------------|-------------------------------|
| <b>2</b>    | AGCCCTCTGTCTCATTCCA           | CCCCACTGAAACCTGTCAA           |
| <b>3</b>    | GCAGCAGTGTGGAGTCTT            | GCAGGCCTCTTCCCGGTA            |
| <b>4</b>    | TGGGCTGGCTGTGCTATG            | TGACCAGGCTACAGCTTTTA          |
| <b>5</b>    | TGGGCATTTTAAAGGGTGTA          | TGTGGAGGCCCGCTTCTA            |
| <b>6</b>    | TGGGGCTAGGGAGGAGAG            | GGCCAAGGGTTGTGGTTA            |
